# Supplementary material for: Associations Among Visceral Fat, All-Cause Mortality, and Obesity-Related Mortality in Japanese Americans
Source: PubMed Central journal article supplement — Diabetes Care. 2012 Jan 16;35(2):296–8. doi: 10.2337/dc11-1193 (PMC3263911; doi:10.2337/dc11-1193), 2012-01-16
Supplement: supp_dc11-1193v111193_DC111193SupplementaryData.pdf [file supp_dc11-1193v111193_DC111193SupplementaryData.pdf]

SUPPLEMENTARY DATA

**Supplementary Table 1.** Hazard ratios for mortality associated with various measures of adiposity, fasting glucose and fasting insulin, adjusted for gender and smoking, over an average follow-up duration of 16.9 years.

| Models                                          | VF                | SAF               | BMI               | Waist             | Glucose           | Insulin           |
|-------------------------------------------------|-------------------|-------------------|-------------------|-------------------|-------------------|-------------------|
| <b>ALL CAUSE MORTALITY</b><br>(107 deaths)      |                   |                   |                   |                   |                   |                   |
| Model 1                                         | 1.39 (1.11, 1.75) |                   |                   |                   |                   |                   |
| Model 2                                         |                   | 1.07 (0.82, 1.39) |                   |                   |                   |                   |
| Model 3                                         |                   |                   | 1.33 (1.02, 1.71) |                   |                   |                   |
| Model 4                                         |                   |                   |                   | 1.24 (0.95, 1.62) |                   |                   |
| Model 5                                         | 1.47 (1.14, 1.89) | 0.87 (0.63, 1.20) |                   |                   |                   |                   |
| Model 6                                         | 1.34 (0.99, 1.82) |                   | 1.07 (0.75, 1.51) |                   |                   |                   |
| Model 7                                         | 1.41 (1.04, 1.92) |                   |                   | 0.96 (0.68, 1.36) |                   |                   |
| Model 8                                         |                   |                   |                   |                   | 1.20 (1.13, 1.28) |                   |
| Model 9                                         |                   |                   |                   |                   |                   | 1.13 (0.97, 1.31) |
| Model 10                                        | 1.23 (0.96, 1.56) |                   |                   |                   | 1.18 (1.11, 1.26) |                   |
| Model 11                                        | 1.24 (0.95, 1.63) |                   |                   |                   |                   | 1.06 (0.89, 1.27) |
| Model 12                                        | 1.18 (0.89, 1.57) |                   |                   |                   | 1.11 (1.04, 1.18) | 0.98 (0.82, 1.18) |
| <b>OBESITY-RELATED MORTALITY</b><br>(68 deaths) |                   |                   |                   |                   |                   |                   |
| Model 1                                         | 1.39 (1.04, 1.85) |                   |                   |                   |                   |                   |
| Model 2                                         |                   | 1.13 (0.83, 1.54) |                   |                   |                   |                   |
| Model 3                                         |                   |                   | 1.46 (1.06, 2.01) |                   |                   |                   |
| Model 4                                         |                   |                   |                   | 1.44 (1.04, 2.00) |                   |                   |
| Model 5                                         | 1.41 (1.03, 1.93) | 0.96 (0.66, 1.40) |                   |                   |                   |                   |
| Model 6                                         | 1.21 (0.83, 1.76) |                   | 1.27 (0.84, 1.94) |                   |                   |                   |

SUPPLEMENTARY DATA

|                           |                   |                   |                   |                   |                   |                   |
|---------------------------|-------------------|-------------------|-------------------|-------------------|-------------------|-------------------|
| Model 7                   | 1.25 (0.86, 1.84) |                   |                   | 1.22 (0.79, 1.88) |                   |                   |
| Model 8                   |                   |                   |                   |                   | 1.24 (1.15, 1.33) |                   |
| Model 9                   |                   |                   |                   |                   |                   | 1.24 (1.04, 1.48) |
| Model 10                  | 1.18 (0.88, 1.60) |                   |                   |                   | 1.22 (1.13, 1.32) |                   |
| Model 11                  | 1.20 (0.86, 1.67) |                   |                   |                   |                   | 1.19 (0.98, 1.45) |
| Model 12                  | 1.10 (0.77, 1.56) |                   |                   |                   | 1.15 (1.07, 1.23) | 1.07 (0.87, 1.33) |
| CVD MORTALITY (46 deaths) |                   |                   |                   |                   |                   |                   |
| Model 1                   | 1.48 (1.06, 2.06) |                   |                   |                   |                   |                   |
| Model 2                   |                   | 1.15 (0.79, 1.68) |                   |                   |                   |                   |
| Model 3                   |                   |                   | 1.54 (1.05, 2.27) |                   |                   |                   |
| Model 4                   |                   |                   |                   | 1.68 (1.14, 2.46) |                   |                   |
| Model 5                   | 1.51 (1.05, 2.17) | 0.95 (0.59, 1.52) |                   |                   |                   |                   |
| Model 6                   | 1.30 (0.84, 2.00) |                   | 1.28 (0.76, 2.14) |                   |                   |                   |
| Model 7                   | 1.22 (0.79, 1.91) |                   |                   | 1.44 (0.86, 2.40) |                   |                   |
| Model 8                   |                   |                   |                   |                   | 1.26 (1.16, 1.36) |                   |
| Model 9                   |                   |                   |                   |                   |                   | 1.20 (0.96, 1.50) |
| Model 10                  | 1.25 (0.88, 1.78) |                   |                   |                   | 1.24 (1.14, 1.35) |                   |
| Model 11                  | 1.28 (0.86, 1.89) |                   |                   |                   |                   | 1.13 (0.87, 1.45) |
| Model 12                  | 1.17 (0.77, 1.77) |                   |                   |                   | 1.17 (1.08, 1.27) | 0.99 (0.75, 1.30) |

Data are hazard ratios (95% CI) per increase equivalent to the magnitude of the interquartile range in visceral fat (VF), subcutaneous abdominal fat (SAF), BMI, waist circumference, fasting glucose or fasting insulin for mortality prior to age 82 years. All models used age at study enrollment as the time axis and are adjusted for sex and smoking.
